# Supplementary material for: An Electrochemical Sensor Based on Electropolymerization of β-Cyclodextrin on Glassy Carbon Electrode for the Determination of Fenitrothion
Source: MDPI journal article supplement (doi:10.3390/s23010435), 2022-12-30
Supplement: s1 [file s1]

## Supporting Information

### An Electrochemical Sensor Based on Electropolymerization of $\beta$ -Cyclodextrin on Glassy Carbon Electrode for the Determination of Fenitrothion

Rong Wang <sup>1,†</sup>, Shulong Wang <sup>1,†</sup>, Caihong Qin <sup>1</sup>, Qiyang Nie <sup>1</sup>, Yougang Luo <sup>1</sup>, Qi-Pin Qin <sup>1</sup>, Ruijuan Wang <sup>1</sup>, Baiquan Liu <sup>2,3,\*</sup> and Dongxiang Luo <sup>4,\*</sup>

<sup>1</sup> Guangxi Key Lab of Agricultural Resources Chemistry and Biotechnology, College of Chemistry and Food Science, Yulin Normal University, 1303 Jiaoyudong Road, Yulin 537000, China

<sup>2</sup> State Key Laboratory of Luminescent Materials and Devices, South China University of Technology, 381 Wushan Road, Guangzhou 510640, China

<sup>3</sup> School of Electronics and Information Technology, Sun Yat-sen University, Guangzhou 510275, China

<sup>4</sup> Huangpu Hydrogen Innovation Center, School of Chemistry and Chemical Engineering, Guangzhou University, Guangzhou 510006, China

\* Correspondence: liubq33@mail.sysu.edu.cn (B.L.); luodx@gzhu.edu.cn (D.L.)

† These authors contributed equally to this work.

#### 1. The scanning electron microscope images of bare GCE and $\beta$ -CDP/GCE

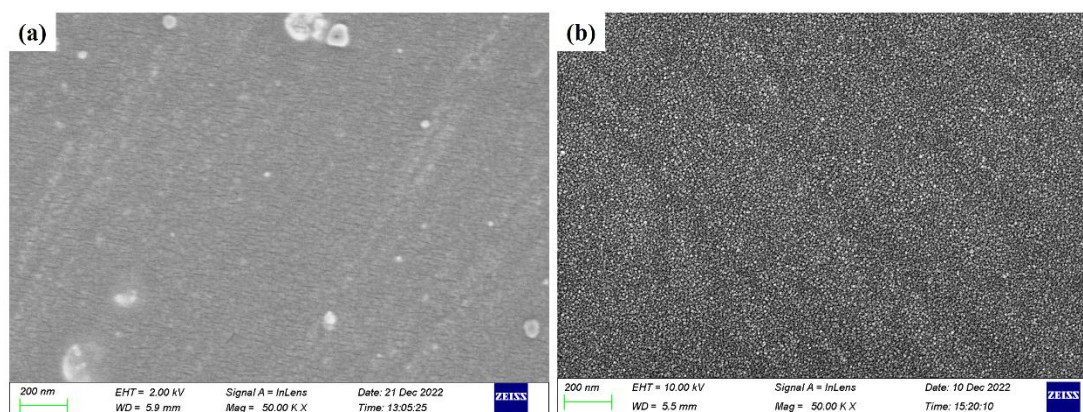

**Figure S1.** The scanning electron microscope images of bare GCE and  $\beta$ -CDP/GCE: (a) bare GCE; (b)  $\beta$ -CDP/GCE.

#### 2. The EIS measurements of bare GCE and $\beta$ -CDP/GCE

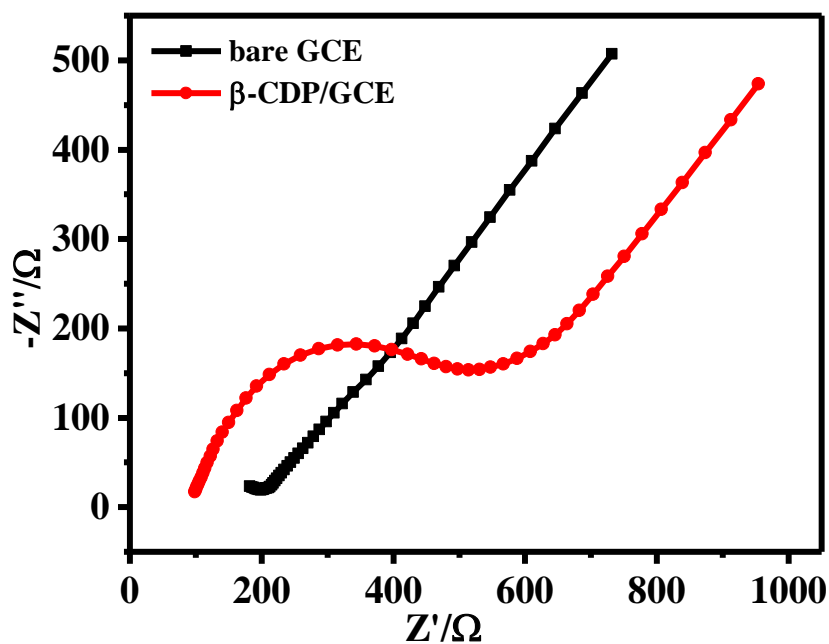

**Figure S2.** The EIS measurements of bare GCE and  $\beta$ -CDP/GCE in 5.0 mM  $\text{K}_3[\text{Fe}(\text{CN})_6]/\text{K}_4[\text{Fe}(\text{CN})_6](1:1)$  containing 0.1 M KCl.

### 3. The effect of scan rate on the $I_{\text{pc},2}$ at $\beta$ -CDP/GCE

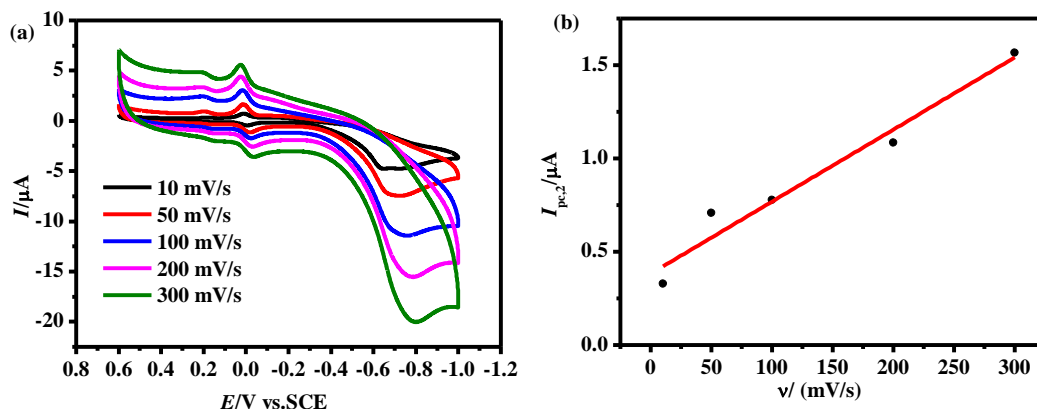

**Figure S3.** The second CV curves of FNT (2  $\mu\text{g}/\text{mL}$  in acetate buffer solution, pH=5.00) with different scan rate (10, 50, 100, 200, 300 mV/s); (b) the plot of the  $I_{\text{pc},2}$  against the scan rate ( $v$ ).

### 4. The electrochemical response of FNT with different methods

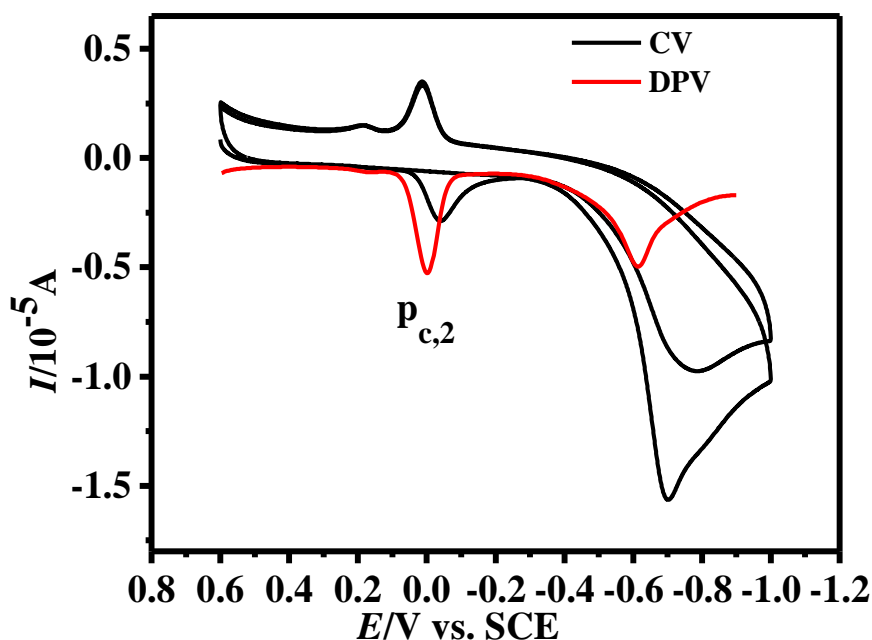

**Figure S4.** The electrochemical response of FNT (2  $\mu\text{g/mL}$  in acetate buffer solution, pH=5.00) with different methods: (black line) the first 2 CV curve with potential from 0.6 to -1.0 V and scan rate of 50 mV/s; (red line) the third-step DPV curve with potential increment of 13mV, amplitude of 50mV, pulse width of 60ms, sampling width of 20ms, pulse period of 500ms and potential from 0.6 to -0.9 V.

##### 5. The electrochemical behavior of $\beta$ -CDP/GCE in blank acetate buffer solution

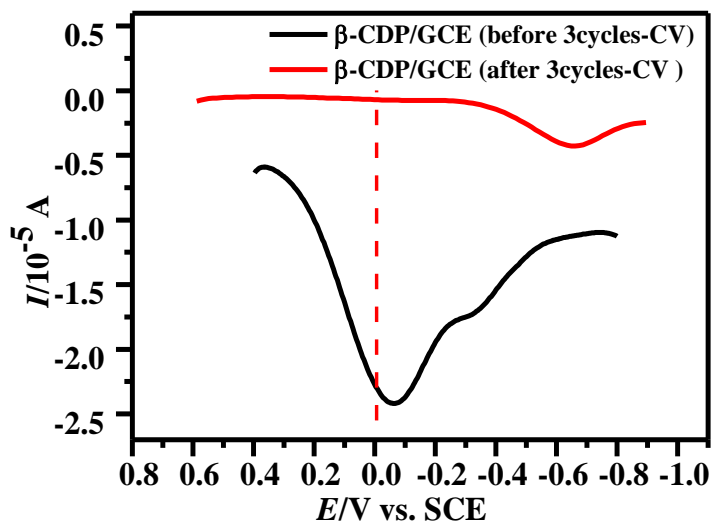

**Figure S5.** The third-step DPV curves of different electrodes in blank (no FNT) acetate buffer solution (PH=5.00), DPV parameters: potential increment of 13 mV, amplitude of 50 mV, pulse width of 60 ms, sampling width of 20 ms, pulse period of 500 ms and potential from 0.6 to -0.9 V

##### 6. The variation of $I_{pc,2}$ with the accumulation time of every step of DPV method

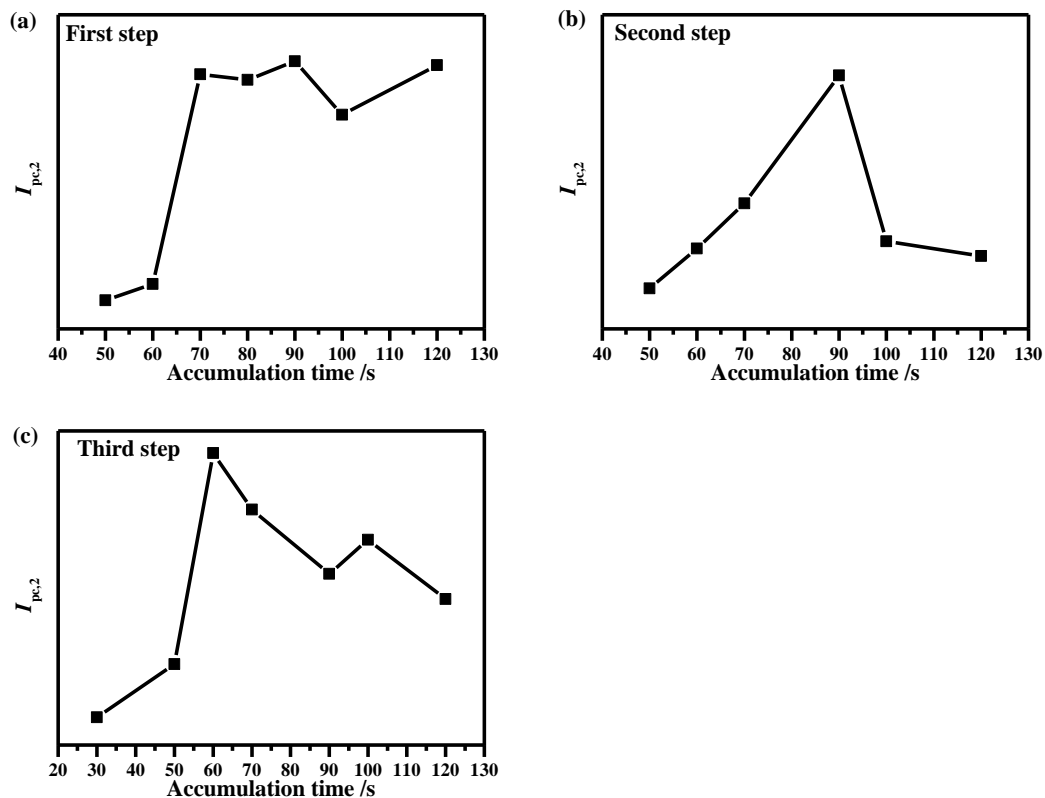

**Figure S6.** The variation of  $I_{pc,2}$  with the accumulation time of every step of DPV method: (a) the first step; (b) the second step; (c) the third step.

## 7. The variation of $I_{pc,2}$ with potential increment and amplitude

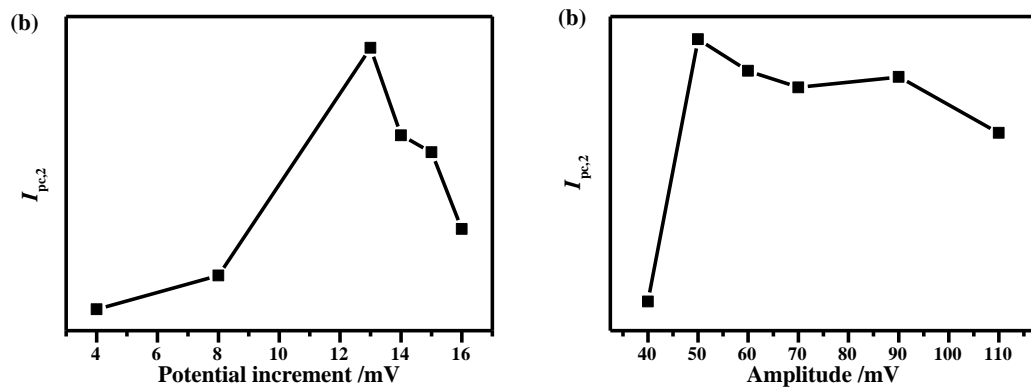

**Figure S7.** (a) The variation of  $I_{pc,2}$  with potential increment; (b) the variation of  $I_{pc,2}$  with amplitude.

## 8. Repeatability and interference

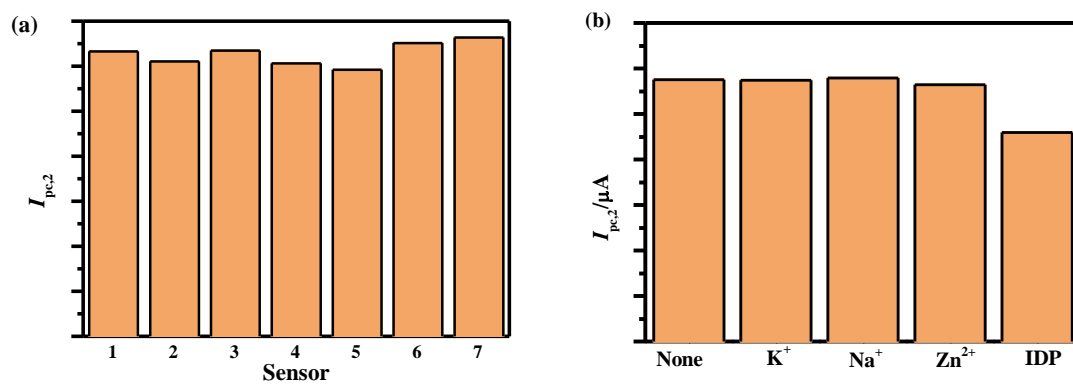

**Figure S8.** (a) The  $I_{pc,2}$  of seven proposed sensors prepared in the same manner; (b) the variation of  $I_{pc,2}$  with different interfering compounds.
